# Supplementary material for: Association between daily consumption of spicy food and bone mineral density in middle-aged and older adults: a cross-sectional study
Source: Royal Society of Chemistry journal article supplement (doi:10.1039/d4fo01893a), 2024-01-01
Supplement: d4fo01893a1.pdf [file d4fo01893a1.pdf]

## **Supplementary Materials**

### **Supplementary Table 1 Osteoporosis Questionnaire**

# Supplementary Table 1 Osteoporosis Questionnaire

## Demographic Characteristics

1.ID number: \_\_\_\_\_ Age \_\_\_\_\_ Sex \_\_\_\_\_

2.Educational status: 1.Illiteracy 2.Elementary 3.Middle school  
4.High school or higher

3.Marital Status: 1.Married 2.Unmarried 3.Divorced 4.Widowed

4.BMI calculation: Height(cm): \_\_\_\_\_ Weight(kg): \_\_\_\_\_ BMI= \_\_\_\_\_

## Living Habits

1.Smoking behavior: 1.Never 2.Current 3.Past

2.Drinking behavior: 1.Never 2.Current 3.Past

## Spicy Food Consumption

1. How often did you consume spicy food during the past year?

0. Never or Seldom 1.Less than once a week 2.1-2 days a week 3.3-5 days a week

4.Daily (4.11 meal/day 4.22 meals/day 4.33 meals/day)

## Medical History

1. Fracture history: 0.No 1.Yes

2. Previous medical history: Thyroid disease 0.No 1.Yes Diabetes 0.No 1.Yes

Rheumatoid arthritis 0.No 1.Yes Other

3.Whether the father or mother had ever been diagnosed with osteoporosis: 0.No 1.Yes

4.Have you ever received anti-osteoporosis drugs?

0.No 1.Yes, \_\_\_\_\_

## Physical Activity

1.Usually, the main forms of physical activity

1.●Walk Slowly 2.●Tai chi or Qigong 3.●Walk Briskly 4.●Swimming Leisurely

5.●Ball Game (Basketball game, Soccer) 6.●Hiking

## Bone Mineral Density and Blood Test Results

### 1. Bone Mineral Density Examination

| Part               | BMD-Value (g/cm <sup>2</sup> ) |
|--------------------|--------------------------------|
| Total Lumbar Spine |                                |
| Left Hip           |                                |
| Femoral Neck       |                                |

### 2. Blood Test

|                           | Biochemical Markers of Bone Metabolism           |                                                               |                          |
|---------------------------|--------------------------------------------------|---------------------------------------------------------------|--------------------------|
| <b>Biochemical Marker</b> | Procollagen Type I-N-terminal Propeptide (ng/ml) | $\beta$ Cross-Linked C-telopeptide of Type I-Collagen (ng/ml) | Osteocalcin (ng/ml)      |
| <b>Value</b>              |                                                  |                                                               |                          |
| <b>Biochemical Marker</b> | Bone Alkaline Phosphatase (U/L)                  | Serum Phosphorus (mmol/L)                                     | Serum Magnesium (mmol/L) |
| <b>Value</b>              |                                                  |                                                               |                          |
| <b>Biochemical Marker</b> | Serum Calcium (mmol/L)                           |                                                               |                          |
| <b>Value</b>              |                                                  |                                                               |                          |
